# Supplementary material for: Enhanced decolorization of aqueous dye solutions by a high quality copolymer flocculant
Source: Royal Society of Chemistry journal article supplement (doi:10.1039/c5ra07662e), 2015-01-01
Supplement: c5ra07662e1.pdf [file c5ra07662e1.pdf]

## **Supporting information**

### **Enhanced Decolorization of Dyes by a High Quality Copolymer Flocculant in Aqueous Solution**

**Lijun You\*, Feifei Lu, Lidao Song, Yeping Yin, Qiqing Zhang\***

Institute of Biomedical and Pharmaceutical Technology & College of Chemistry  
and Chemical Engineering, Fuzhou University, Fuzhou 350001, China

\* Corresponding author: Lijun You; Qiqing Zhang

Phone: +86-591-83725260; fax: +86-591-83725260

E-mail address: yljyoyo@126.com (L. You) ; zhangqiq@126.com (Q. Zhang)

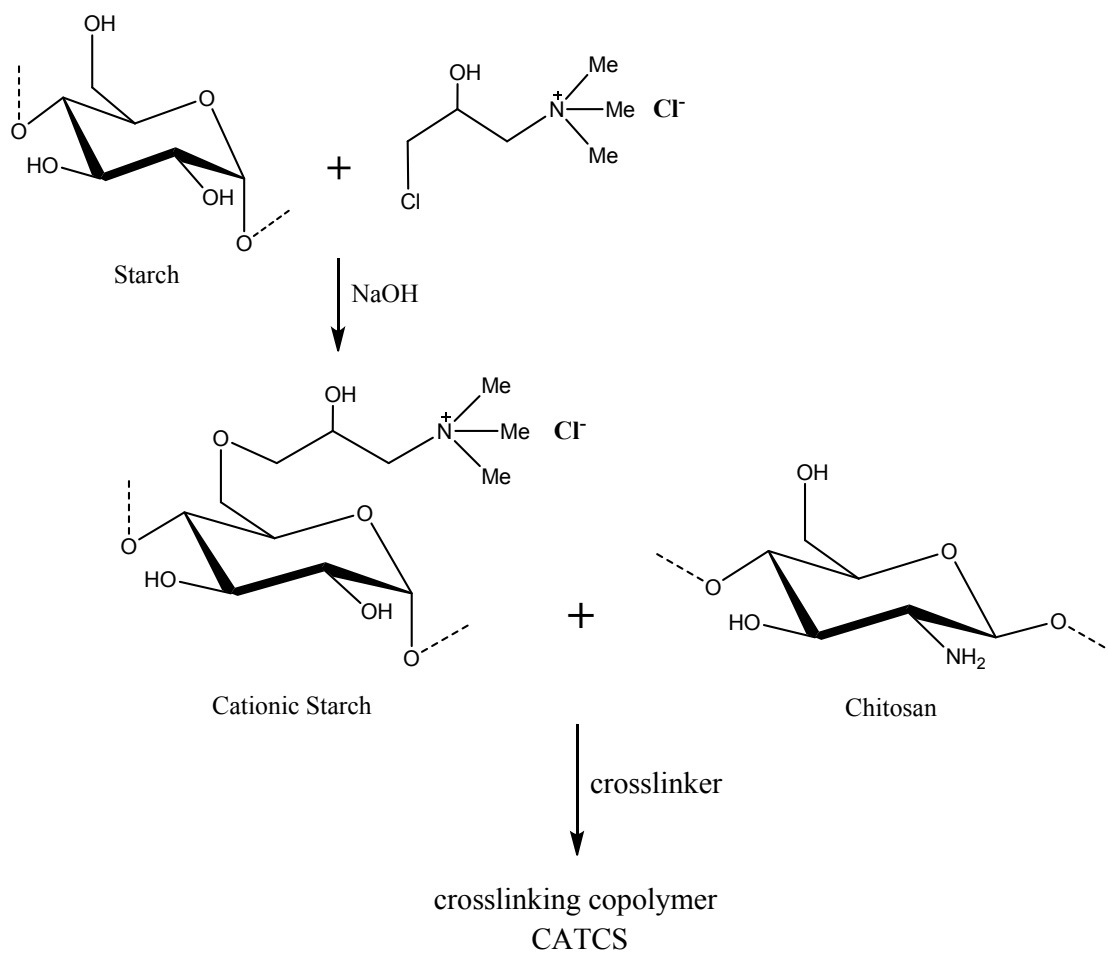

**Scheme 1.** Schematic representation for the synthesis of CATCS.

(1) C.I. Reactive Yellow 1

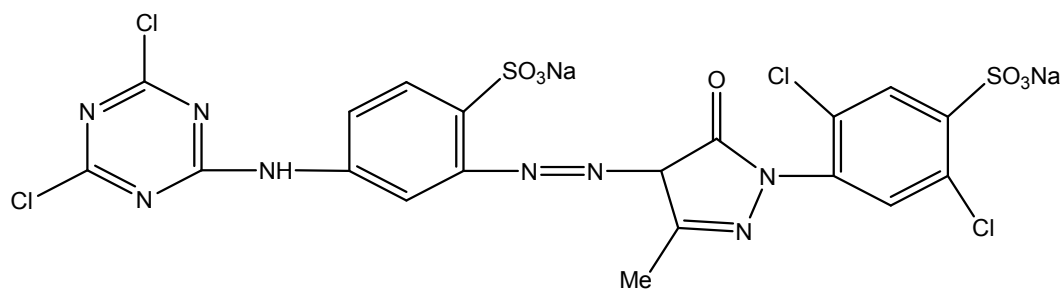

(2) C.I. Reactive violet 2

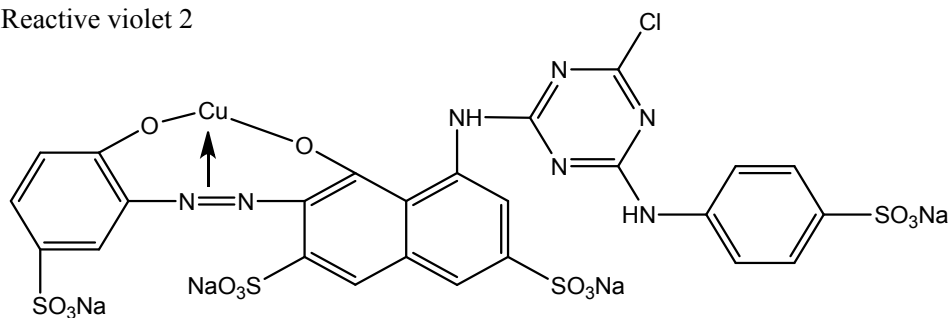

(3) C.I. Acid Red 18

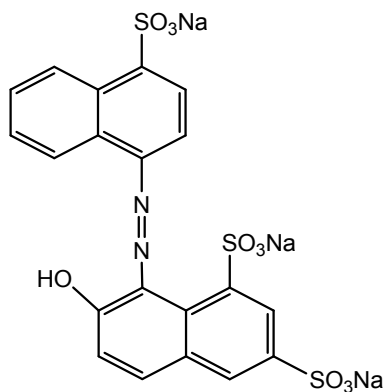

(4) C.I. Direct Blue 71

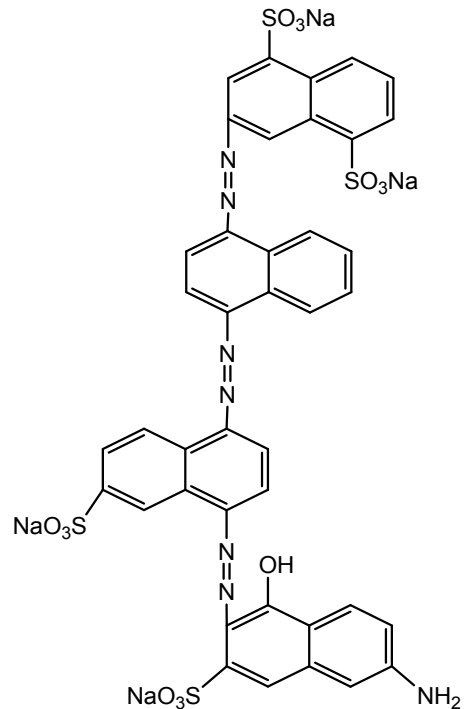

**Figure S1.** Chemical formula of dyes used in this study (the maximum absorbency wavelength of C.I. Reactive Yellow 1, C.I. Reactive violet 2, C.I. Acid Red 18 and C.I. Direct Blue 71 is 401 nm, 552 nm, 510 nm and 570 nm, respectively).

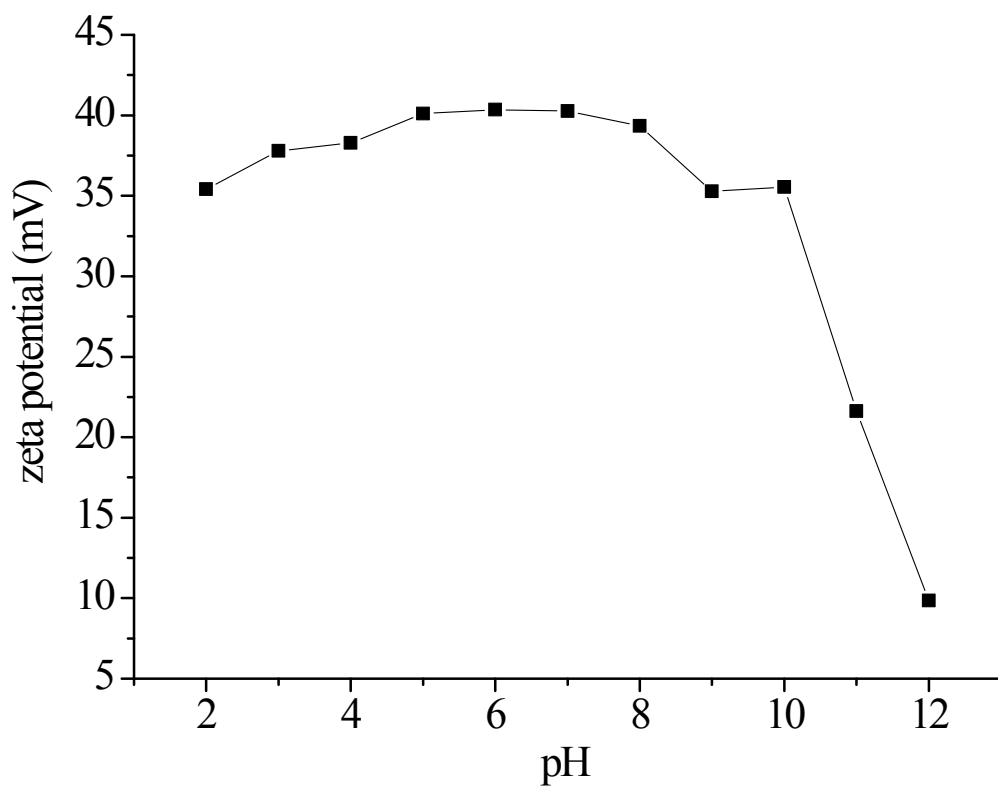

**Figure S2.** pH effect on zeta potential of CATCS.

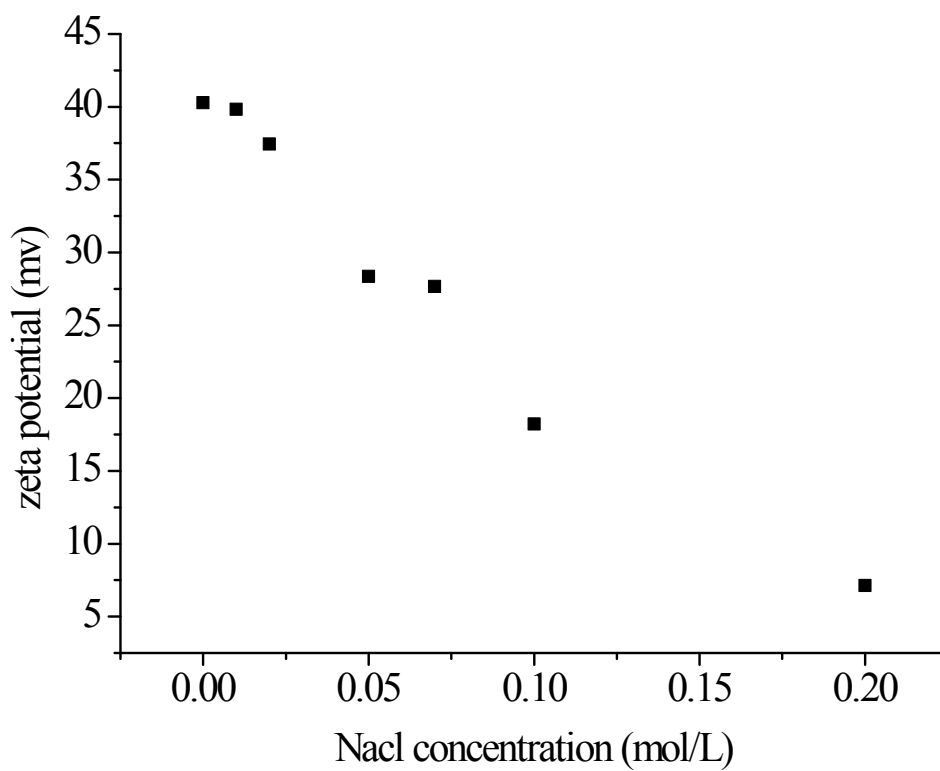

**Figure S3.** Effect of NaCl on zeta potential of CATCS.

**Table S1.** Linear fitting parameters of isotherms of C.I. Reactive Yellow 1 by CATCS at various temperatures

| T(K)   | Tempkin         |                 |        | R-P isotherm    |                              |          |       |
|--------|-----------------|-----------------|--------|-----------------|------------------------------|----------|-------|
|        | $K_t$<br>(L/mg) | $B_1$<br>(L/mg) | $R^2$  | $K_R$<br>(L/mg) | $b_R$<br>(L/mg) <sup>a</sup> | $\alpha$ | $R^2$ |
| 293.15 | 4.042           | 91.273          | 0.9057 | 591.7           | 3.183                        | 0.7441   | 0.889 |
| 298.15 | 3.672           | 103.13          | 0.9085 | 651.5           | 3.267                        | 0.7302   | 0.890 |
| 303.15 | 6.547           | 99.349          | 0.9079 | 694.6           | 2.667                        | 0.7834   | 0.893 |
| 308.15 | 8.632           | 98.966          | 0.9266 | 723.3           | 2.503                        | 0.8047   | 0.895 |
| 313.15 | 9.600           | 105.26          | 0.8904 | 750.9           | 2.341                        | 0.8072   | 0.893 |

**Table S2.** Linear fitting parameters of isotherms of C.I. Reactive violet 2 by CATCS at various temperatures

| T(K)   | Tempkin         |                 |        | R-P isotherm    |                              |          |       |
|--------|-----------------|-----------------|--------|-----------------|------------------------------|----------|-------|
|        | $K_t$<br>(L/mg) | $B_1$<br>(L/mg) | $R^2$  | $K_R$<br>(L/mg) | $b_R$<br>(L/mg) <sup>a</sup> | $\alpha$ | $R^2$ |
| 293.15 | 1.564           | 202.95          | 0.9277 | 891.54          | 4.098                        | 0.6118   | 0.889 |
| 298.15 | 1.387           | 226.32          | 0.944  | 938.23          | 4.383                        | 0.5781   | 0.890 |
| 308.15 | 1.924           | 239.00          | 0.9128 | 1083.41         | 3.929                        | 0.6072   | 0.893 |
| 313.15 | 1.636           | 271.75          | 0.927  | 1216.7          | 4.547                        | 0.5634   | 0.930 |

**Table S3.** Linear fitting parameters of isotherms of C.I. Acid Red 18 by CATCS at various temperatures

| T(K)   | Tempkin         |                 |        | R-P isotherm    |                              |          |        |
|--------|-----------------|-----------------|--------|-----------------|------------------------------|----------|--------|
|        | $K_t$<br>(L/mg) | $B_1$<br>(L/mg) | $R^2$  | $K_R$<br>(L/mg) | $b_R$<br>(L/mg) <sup>a</sup> | $\alpha$ | $R^2$  |
| 293.15 | 1.564           | 227.52          | 0.9063 | 1053.2          | 3.135                        | 0.7091   | 0.896  |
| 298.15 | 1.387           | 295.41          | 0.9155 | 1244.9          | 4.414                        | 0.6394   | 0.8951 |
| 303.15 | 1.924           | 395.48          | 0.902  | 1450            | 7.368                        | 0.5331   | 0.8935 |
| 308.15 | 1.636           | 289.29          | 0.9298 | 1512.5          | 2.984                        | 0.7469   | 0.8968 |
| 313.15 | 1.636           | 297.7           | 0.9127 | 1601.2          | 2.366                        | 0.7571   | 0.8986 |

**Table S4.** Linear fitting parameters of isotherms of C.I. Direct Blue 71 by CATCS at various temperatures

| T(K)   | Tempkin isotherm |                 |        | R - P isotherm  |                              |          |        |
|--------|------------------|-----------------|--------|-----------------|------------------------------|----------|--------|
|        | $K_t$<br>(L/mg)  | $B_1$<br>(L/mg) | $R^2$  | $K_R$<br>(L/mg) | $b_R$<br>(L/mg) <sup>a</sup> | $\alpha$ | $R^2$  |
| 293.15 | 8.667742         | 323.73          | 0.8738 | 1825.6          | 1.415383                     | 0.8922   | 0.8943 |
| 298.15 | 45.19887         | 335.26          | 0.8904 | 2387.5          | 2.611696                     | 0.751    | 0.8973 |
| 303.15 | 166.4683         | 276.12          | 0.8749 | 2420.1          | 1.264276                     | 1.0591   | 0.8865 |
| 308.15 | 363.6281         | 253.59          | 0.8372 | 3100.2          | 2.663391                     | 0.7605   | 0.8996 |
| 313.15 | 104.9358         | 296.84          | 0.8433 | 3183.7          | 1.815389                     | 0.7478   | 0.8994 |

**Table S5.** Non-linear fitting parameters of isotherms of C.I. Reactive Yellow 1 by CATCS at various temperatures.

| T(K)   | Langmuir                 |                         |                | Freundlich               |      |                | D-R isotherm             |                                          |                |
|--------|--------------------------|-------------------------|----------------|--------------------------|------|----------------|--------------------------|------------------------------------------|----------------|
|        | Q <sub>L</sub><br>(mg/g) | K <sub>L</sub><br>(/mg) | R <sup>2</sup> | K <sub>F</sub><br>(L/mg) | n    | R <sup>2</sup> | Q <sub>D</sub><br>(mg/g) | β<br>(mg <sup>2</sup> /kJ <sup>2</sup> ) | R <sup>2</sup> |
| 293.15 | 513                      | 0.252                   | 0.986          | 179.12                   | 3.93 | 0.936          | 449.12                   | 1.08                                     | 0.835          |
| 298.15 | 555                      | 0.254                   | 0.990          | 191.81                   | 3.73 | 0.933          | 475.42                   | 0.97                                     | 0.899          |
| 303.15 | 579                      | 0.375                   | 0.978          | 226.82                   | 4.13 | 0.942          | 515.83                   | 0.95                                     | 0.869          |
| 308.15 | 621                      | 0.358                   | 0.990          | 248.91                   | 4.29 | 0.924          | 540.68                   | 0.49                                     | 0.811          |
| 313.15 | 651                      | 0.418                   | 0.989          | 280.48                   | 4.63 | 0.890          | 569.28                   | 0.40                                     | 0.782          |

**Table S6.** Non-linear fitting parameters of isotherms of C.I. Reactive violet 2 by CATCS at various temperatures.

| T(K)   | Langmuir                 |                          |                | Freundlich               |      |                | D-R isotherm             |                                          |                |
|--------|--------------------------|--------------------------|----------------|--------------------------|------|----------------|--------------------------|------------------------------------------|----------------|
|        | Q <sub>L</sub><br>(mg/g) | K <sub>L</sub><br>(L/mg) | R <sup>2</sup> | K <sub>F</sub><br>(L/mg) | n    | R <sup>2</sup> | Q <sub>D</sub><br>(mg/g) | β<br>(mg <sup>2</sup> /kJ <sup>2</sup> ) | R <sup>2</sup> |
| 293.15 | 961                      | 0.159                    | 0.946          | 258.88                   | 3.18 | 0.823          | 790.69                   | 2.50                                     | 0.990          |
| 298.15 | 1039                     | 0.151                    | 0.961          | 261.85                   | 2.99 | 0.835          | 832.07                   | 2.44                                     | 0.980          |
| 308.15 | 1132                     | 0.200                    | 0.924          | 316.54                   | 3.13 | 0.808          | 951.94                   | 1.59                                     | 0.990          |
| 313.15 | 1228                     | 0.187                    | 0.907          | 311.80                   | 2.82 | 0.830          | 1001.6                   | 1.51                                     | 0.986          |

**Table S7.** Non-linear fitting parameters of isotherms of C.I. Acid Red 18 by CATCS at various temperatures.

| T(K)   | Langmuir                 |                          |                | Freundlich               |      |                | D-R isotherm             |                                          |                |
|--------|--------------------------|--------------------------|----------------|--------------------------|------|----------------|--------------------------|------------------------------------------|----------------|
|        | Q <sub>L</sub><br>(mg/g) | K <sub>L</sub><br>(L/mg) | R <sup>2</sup> | K <sub>F</sub><br>(L/mg) | n    | R <sup>2</sup> | Q <sub>D</sub><br>(mg/g) | β<br>(mg <sup>2</sup> /kJ <sup>2</sup> ) | R <sup>2</sup> |
| 293.15 | 1231                     | 0.094                    | 0.844          | 306.44                   | 3.25 | 0.980          | 1057.3                   | 9.98                                     | 0.683          |
| 298.15 | 1508                     | 0.066                    | 0.941          | 347.3                    | 2.71 | 0.981          | 1078.9                   | 3.54                                     | 0.628          |
| 303.15 | 1519                     | 0.036                    | 0.930          | 359.60                   | 2.19 | 0.982          | 1349.4                   | 2.86                                     | 0.701          |
| 308.15 | 1582                     | 0.117                    | 0.925          | 410.84                   | 3.28 | 0.988          | 1257.2                   | 1.52                                     | 0.527          |
| 313.15 | 1610                     | 0.293                    | 0.935          | 510.54                   | 3.12 | 0.986          | 1325.3                   | 0.55                                     | 0.685          |

**Table S8.** Non-linear fitting parameters of isotherms of C.I. Direct Blue 71 by CATCS at various temperatures.

| T(K)   | Langmuir                 |                          |                | Freundlich               |      |                | D-R isotherm             |                                          |                |
|--------|--------------------------|--------------------------|----------------|--------------------------|------|----------------|--------------------------|------------------------------------------|----------------|
|        | Q <sub>L</sub><br>(mg/g) | K <sub>L</sub><br>(L/mg) | R <sup>2</sup> | K <sub>F</sub><br>(L/mg) | n    | R <sup>2</sup> | Q <sub>D</sub><br>(mg/g) | β<br>(mg <sup>2</sup> /kJ <sup>2</sup> ) | R <sup>2</sup> |
| 293.15 | 2129                     | 0.094                    | 0.944          | 764.91                   | 4.18 | 0.992          | 1804.5                   | 0.25                                     | 0.516          |
| 298.15 | 2672                     | 0.143                    | 0.965          | 840.96                   | 3.83 | 0.970          | 2210.1                   | 2.49                                     | 0.683          |
| 303.15 | 2527                     | 0.989                    | 0.828          | 1150.2                   | 4.54 | 0.982          | 2395.8                   | 0.09                                     | 0.732          |
| 308.15 | 2632                     | 0.117                    | 0.925          | 1189.2                   | 4.32 | 0.998          | 257.4                    | 0.41                                     | 0.664          |
| 313.15 | 2869                     | 0.448                    | 0.863          | 1277.1                   | 4.24 | 0.993          | 2678.3                   | 0.33                                     | 0.674          |

**Table S9.** Kinetic parameters for C.I. Reactive yellow 1, C.I. Reactive violet 2, C.I. Acid Red 18 and C.I. Direct Blue 71 by CATCS.

| dyes                      | The Elovich Equation |                        |                 | R <sup>2</sup> |
|---------------------------|----------------------|------------------------|-----------------|----------------|
|                           | T<br>K               | $\alpha$<br>mg/(g·min) | $\beta$<br>g/mg |                |
| C.I.Reactive<br>yellow 1  | 293.15               | 81198.8                | 0.0210          | 0.8675         |
|                           | 298.15               | 6379.9                 | 0.0229          | 0.8663         |
|                           | 303.15               | 34651.4                | 0.0230          | 0.8727         |
|                           | 308.15               | 8601.4                 | 0.0187          | 0.9127         |
|                           | 313.15               | 80848.6                | 0.0209          | 0.8875         |
| C.I. Reactive<br>violet 2 | 288.15               | 103.6                  | 0.0136          | 0.9049         |
|                           | 293.15               | 406.5                  | 0.0166          | 0.9244         |
|                           | 298.15               | 2313.5                 | 0.0174          | 0.8365         |
| C.I. Acid Red 18          | 308.15               | 3756.2                 | 0.0166          | 0.8955         |
|                           | 288.15               | 4342.5                 | 0.0183          | 0.8417         |
|                           | 293.15               | 6208.4                 | 0.0139          | 0.8118         |
|                           | 298.15               | 5391.2                 | 0.0130          | 0.7691         |
|                           | 308.15               | 3433.3                 | 0.0109          | 0.8596         |
| C.I. Direct Blue 71       | 318.15               | 7821.7                 | 0.0115          | 0.8232         |
|                           | 288.15               | 353.1                  | 0.0032          | 0.9045         |
|                           | 298.15               | 999.1                  | 0.0035          | 0.8921         |
|                           | 303.15               | 45144.1                | 0.0025          | 0.9029         |
|                           | 308.15               | 786.7                  | 0.0025          | 0.9069         |
|                           | 313.15               | 517.1                  | 0.0023          | 0.9001         |
